# Supplementary material for: Isolation and characterization of main group and late transition metal complexes using orthometallated imine ligands
Source: Royal Society of Chemistry journal article supplement (doi:10.1039/c1dt11629k), 2011-11-17
Supplement: c1dt11629k.pdf [file c1dt11629k.pdf]

## Supplemental Information

### Isolation and Characterization of Main Group and Late Transition Metal Complexes using *ortho*Metallated Imine Ligands

John F. Beck and Joseph A.R. Schmidt\*

Department of Chemistry, School for Green Chemistry and Engineering, College of Natural  
Sciences & Mathematics, The University of Toledo

2801 W. Bancroft St. MS 602, Toledo, OH 43606-3390, USA

## Discussion of compound 15

The reaction of  $\text{AlCl}_3$  (1 eq.) and  $\text{Li-L}^1$  (2 eq.) yielded compound **2** in moderate yield; however, upon crystallization from toluene a single crystal of  $\text{Al(L}^1\text{)Cl}_2$  (**15**) was isolated. All attempts to synthesize **15** as a major reaction product failed. Changing the solvent used and the ratio of  $\text{Li-L}^1$  to  $\text{AlCl}_3$  had no effect.

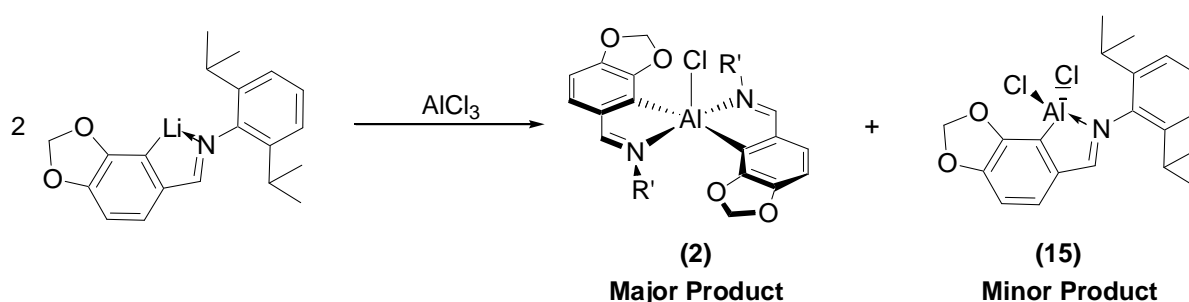

**Scheme S1.** The reaction of  $\text{Li-L}^1$  with  $\text{AlCl}_3$  yields **2** and a small amount of **15**, which was characterized via X-ray crystallography ( $\text{R}' = 2,6\text{-iPr}_2\text{C}_6\text{H}_3$ ).

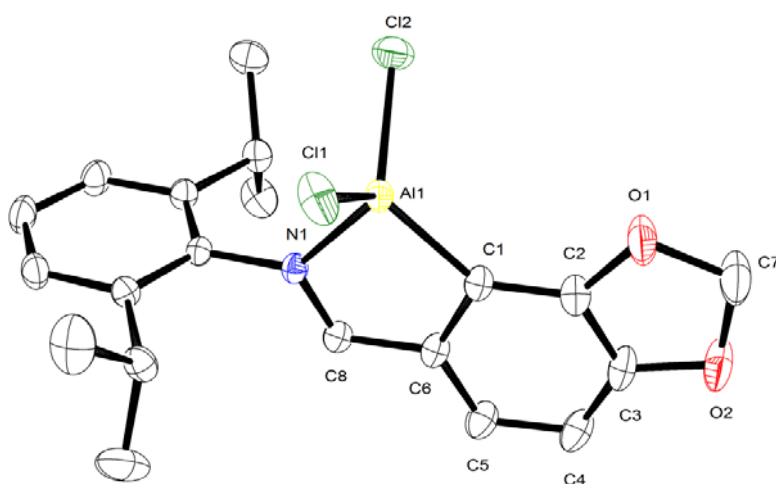

**Figure S2.** ORTEP diagram (50% thermal ellipsoids) of  $\text{Al(L}^1\text{)Cl}_2$  (**15**). Hydrogen atoms removed for clarity.

**Table S1.** Crystallographic data for compound **15**

| Compound                                                                  | <b>15</b>                                                         |
|---------------------------------------------------------------------------|-------------------------------------------------------------------|
| Formula                                                                   | C <sub>20</sub> H <sub>22</sub> AlCl <sub>2</sub> NO <sub>2</sub> |
| Formula weight                                                            | 406.27                                                            |
| Space group                                                               | <i>P</i> 2 <sub>1</sub> / <i>n</i>                                |
| Crystal system                                                            | Monoclinic                                                        |
| Temperature (K)                                                           | 140                                                               |
| <i>a</i> (Å)                                                              | 10.0807(8)                                                        |
| <i>b</i> (Å)                                                              | 16.688(1)                                                         |
| <i>c</i> (Å)                                                              | 12.164(1)                                                         |
| $\alpha$ (°)                                                              | 90.00                                                             |
| $\beta$ (°)                                                               | 98.214(2)                                                         |
| $\gamma$ (°)                                                              | 90.00                                                             |
| <i>V</i> (Å <sup>3</sup> )                                                | 2025.3(3)                                                         |
| <i>Z</i>                                                                  | 4                                                                 |
| Density <sub>calc</sub> (g/cm <sup>3</sup> )                              | 1.332                                                             |
| Diffractometer                                                            | Siemens SMART                                                     |
| Radiation                                                                 | Mo-K $\alpha$ ( $\lambda$ = 0.71073 Å)                            |
| Monochromator                                                             | Graphite                                                          |
| Detector                                                                  | CCD detector                                                      |
| Scan type, width                                                          | $\omega$ , 0.3°                                                   |
| Scan speed (s)                                                            | 25                                                                |
| Reflections measured                                                      | Hemisphere                                                        |
| 2 $\theta$ range (°)                                                      | 4.18-56.66                                                        |
| Crystal dimensions (mm)                                                   | 0.10 x 0.08 x 0.06                                                |
| Reflections measured                                                      | 29012                                                             |
| Unique reflections                                                        | 5049                                                              |
| Observations ( <i>I</i> > 2 $\sigma$ ( <i>I</i> ))                        | 4580                                                              |
| <i>R</i> <sub>int</sub>                                                   | 0.0358                                                            |
| Parameters                                                                | 236                                                               |
| <i>R</i> <sub>obs</sub> , <i>R</i> <sub>w</sub> , <i>R</i> <sub>all</sub> | 0.0352, 0.0969, 0.0387                                            |
| GoF                                                                       | 1.047                                                             |

**15:** X-ray quality crystals were grown from a saturated toluene solution at -25°C. The final cycle of full-matrix least-squares refinement was based on 4580 observed reflections and 236 variable parameters and converged yielding final residuals:  $R = 0.0352$ ,  $R_{\text{all}} = 0.0387$ , and  $\text{GOF} = 1.047$ .
